# Supplementary material for: In-hospital cardiac arrest (IHCA): survival status and its determinants in Malaysian public healthcare
Source: PeerJ. 2025 Jul 4;13:e19509. doi: 10.7717/peerj.19509 (PMC12232926; doi:10.7717/peerj.19509)
Supplement: Supplemental Information 4 [file peerj-13-19509-s004.xlsx]

## Sheet: Sheet1
IHCA_Lo3	firstshocknonshockablerhythm	cpr_adrenaline	witnessedarrest
1	1	>3min	1
1	1	>3min	1
1	1	>3min	1
2	1	=<3min	1			. logistic surv_1 i.IHCA_Lo3 i.firstshocknonshockablerhythm i.cpr_adrenaline i.witnessedarrest
1	1	>3min	1
1	1	>3min	1			Logistic regression Number of obs = 934
1	1	>3min	1			LR chi2(4) = 52.09
1	1	>3min	1			Prob > chi2 = 0.0000
2	1	>3min	1			Log likelihood = -185.76939 Pseudo R2 = 0.1230
2	1	>3min	1
1	1	>3min	1			------------------------------------------------------------------------------------------------
1	1	>3min	1			surv_1 | Odds ratio Std. err. z P>|z| [95% conf. interval]
1	1	>3min	1			-------------------------------+----------------------------------------------------------------
1	1	>3min	1			2.IHCA_Lo3 | 1.94824 .6010445 2.16 0.031 1.064245 3.566511
1	1	>3min	1			2.firstshocknonshockablerhythm | 4.439302 1.520096 4.35 0.000 2.269071 8.685227
1	1	=<3min	1			|
1	1	>3min	0			cpr_adrenaline |
1	1	>3min	1			>3min | .2600246 .0792514 -4.42 0.000 .1430809 .4725495
2	2	>3min	1			1.witnessedarrest | 1.17597 .7341688 0.26 0.795 .3459261 3.99769
2	2	=<3min	1			_cons | .0857684 .0558041 -3.77 0.000 .023961 .3070086
2	1	=<3min	1			------------------------------------------------------------------------------------------------
1	1	>3min	1			Note: _cons estimates baseline odds.
1	1	>3min	1
1	1	>3min	1
1	2	>3min	1
1	1	>3min	1
1	1	>3min	1
2	1	=<3min	1
1	1	>3min	1
1	1	>3min	1
1	1	>3min	1
1	2	>3min	1
1	1	>3min	1
1	1	>3min	0
1	1	>3min	1
1	1	>3min	1
1	1	>3min	1
2	1	>3min	1
1	1	>3min	1
1	1	>3min	1
1	1	>3min	0
1	1	>3min	1
2	1	>3min	1
1	1	>3min	1
2	2	>3min	1
1	1	>3min	0
2	1	>3min	1
2	2	>3min	0
2	1	>3min	1
2	1	>3min	1
1	1	=<3min	1
1	1	>3min	1
2	1	=<3min	1
2	1	>3min	1
2	1	>3min	1
2	1	>3min	1
1	1	>3min	1
2	1	=<3min	1
1	1	>3min	0
2	1	=<3min	1
2	1	>3min	1
2	1	>3min	1
1	1	>3min	1
2	1	>3min	0
2	1	>3min	1
1	1	>3min	1
1	1	>3min	0
1	1	>3min	1
2	1	>3min	1
1	1	>3min	1
1	1	>3min	0
1	1	>3min	1
1	1	>3min	1
1	1	=<3min	1
2	1	>3min	1
2	1	>3min	1
2	1	=<3min	1
1	1	>3min	1
2	1	>3min	1
2	2	>3min	1
1	1	>3min	0
1	1	>3min	1
2	1	>3min	1
2	1	>3min	1
1	1	>3min	0
2	1	>3min	1
2	1	>3min	1
2	1	>3min	1
2	1	=<3min	1
2	1	>3min	1
1	1	>3min	1
2	1	>3min	1
2	2	>3min	1
2	1	>3min	1
2	1	>3min	1
1	1	>3min	1
1	1	>3min	0
1	1	>3min	1
2	1	>3min	1
2	2	>3min	1
2	2	>3min	1
2	1	>3min	1
1	1	>3min	1
1	2	>3min	1
1	1	>3min	1
1	1	>3min	1
1	1	>3min	1
1	1	>3min	0
2	2	>3min	1
1	1	=<3min	0
2	1	>3min	1
1	1	>3min	1
1	1	>3min	1
1	1	>3min	1
1	1	>3min	1
2	1	>3min	1
1	1	>3min	1
2	1	>3min	1
1	1	>3min	1
1	1	>3min	1
2	1	>3min	1
2	1	>3min	1
1	1	>3min	1
2	1	>3min	1
2	1	>3min	1
2	2	>3min	1
1	1	>3min	1
1	1	>3min	1
1	1	>3min	1
1	1	>3min	1
2	2	>3min	1
2	1	=<3min	1
2	1	>3min	1
1	1	>3min	1
1	1	>3min	1
2	2	>3min	1
2	1	>3min	1
1	1	=<3min	1
2	1	=<3min	1
2	2	>3min	1
1	1	>3min	0
1	1	>3min	1
2	1	>3min	1
2	1	=<3min	1
2	2	>3min	1
1	1	>3min	1
1	1	=<3min	0
2	2	>3min	1
1	2	>3min	1
1	1	=<3min	1
1	1	>3min	1
1	1	>3min	1
2	1	>3min	1
2	1	>3min	1
1	1	>3min	0
1	1	>3min	1
2	1	>3min	1
2	1	>3min	1
2	1	=<3min	1
2	1	>3min	1
2	1	>3min	1
1	1	=<3min	1
2	1	=<3min	1
2	1	=<3min	1
2	1	=<3min	1
1	1	>3min	0
1	1	>3min	1
1	1	>3min	1
1	1	>3min	0
1	1	>3min	1
1	1	>3min	1
2	1	>3min	1
1	2	>3min	1
1	1	=<3min	1
1	1	=<3min	1
1	1	=<3min	1
2	1	>3min	1
2	2	>3min	1
2	1	=<3min	1
2	1	>3min	1
2	2	>3min	1
2	1	>3min	1
2	1	>3min	1
2	1	>3min	1
1	1	>3min	1
1	1	>3min	1
1	2	>3min	1
1	1	>3min	1
1	1	>3min	1
1	1	>3min	1
2	2	>3min	1
1	1	>3min	1
2	1	>3min	1
1	1	>3min	1
2	1	>3min	1
2	1	>3min	1
1	1	>3min	1
1	1	>3min	1
1	1	>3min	1
1	1	>3min	1
1	2	>3min	1
1	1	>3min	0
1	1	=<3min	1
1	1	>3min	1
2	1	>3min	1
2	1	>3min	1
1	1	>3min	1
1	2	>3min	1
2	1	>3min	1
1	1	>3min	1
1	1	>3min	0
1	1	>3min	1
1	1	>3min	1
1	1	>3min	1
1	1	>3min	1
1	1	>3min	1
1	1	>3min	1
1	1	>3min	1
1	1	>3min	1
2	1	>3min	1
2	2	>3min	1
1	1	>3min	0
1	1	>3min	0
1	1	>3min	1
2	2	>3min	1
1	1	>3min	1
1	1	>3min	1
2	1	>3min	1
2	1	=<3min	1
1	1	>3min	1
2	1	>3min	1
1	1	>3min	1
1	1	>3min	1
2	1	>3min	1
2	1	=<3min	1
1	1	>3min	1
1	1	>3min	1
1	1	=<3min	0
1	1	>3min	1
2	1	>3min	1
1	1	>3min	1
2	1	>3min	1
2	1	>3min	1
1	1	>3min	1
2	1	>3min	1
2	2	>3min	1
1	1	>3min	0
1	2	>3min	1
2	2	=<3min	1
1	1	>3min	1
2	1	>3min	0
1	1	>3min	1
1	1	>3min	0
1	1	>3min	1
2	1	>3min	1
1	1	>3min	1
1	1	>3min	1
1	1	=<3min	1
1	1	>3min	1
1	1	>3min	1
1	1	>3min	1
2	2	>3min	1
1	1	>3min	1
1	1	>3min	1
1	1	>3min	1
1	2	>3min	1
1	1	>3min	0
1	1	>3min	1
1	1	=<3min	1
1	1	>3min	1
1	1	>3min	1
2	2	>3min	1
2	1	>3min	1
1	1	>3min	1
1	2	>3min	1
1	1	>3min	1
1	1	>3min	1
1	1	>3min	1
2	2	=<3min	1
1	1	>3min	1
1	1	>3min	0
1	1	>3min	0
2	1	=<3min	1
1	1	>3min	0
2	1	=<3min	1
2	1	=<3min	1
2	2	>3min	1
1	1	>3min	1
1	1	>3min	1
2	1	>3min	1
2	1	>3min	1
2	1	>3min	1
1	1	>3min	1
1	1	>3min	1
1	1	=<3min	1
1	1	>3min	1
1	1	>3min	1
1	1	>3min	1
2	1	>3min	1
1	1	>3min	1
1	1	>3min	1
2	1	>3min	1
1	1	=<3min	1
2	1	=<3min	1
1	2	>3min	1
2	1	=<3min	0
2	1	=<3min	1
2	1	>3min	1
1	1	>3min	1
1	1	>3min	0
2	1	>3min	1
1	1	>3min	1
2	1	=<3min	1
1	1	>3min	1
1	1	>3min	1
2	1	>3min	1
1	1	>3min	1
2	1	=<3min	1
1	1	>3min	1
1	1	>3min	1
1	1	=<3min	0
2	1	=<3min	1
2	1	>3min	1
1	1	>3min	1
2	1	>3min	1
1	1	>3min	1
2	1	>3min	1
1	1	>3min	1
2	1	>3min	1
1	1	>3min	1
1	1	>3min	1
2	1	=<3min	1
1	1	>3min	1
2	2	=<3min	1
2	1	>3min	1
1	1	>3min	0
2	1	>3min	1
2	1	=<3min	1
1	1	>3min	1
1	1	>3min	1
2	1	>3min	1
1	1	>3min	1
2	1	>3min	1
1	1	>3min	1
2	1	=<3min	1
1	1	>3min	0
2	1	>3min	1
1	1	>3min	1
1	1	>3min	1
1	1	>3min	1
1	1	>3min	1
2	1	>3min	1
1	1	>3min	1
2	1	>3min	1
1	1	>3min	1
2	1	>3min	1
1	1	>3min	1
2	1	>3min	1
1	1	>3min	1
1	1	>3min	1
1	1	>3min	1
2	1	>3min	1
1	1	>3min	1
1	1	>3min	1
1	1	>3min	1
1	1	>3min	1
2	1	>3min	1
1	1	=<3min	1
1	1	>3min	1
1	1	>3min	0
1	1	>3min	1
2	1	=<3min	1
1	1	>3min	1
2	1	=<3min	1
2	2	>3min	1
1	1	>3min	1
1	1	>3min	1
2	1	>3min	1
1	1	>3min	1
2	1	>3min	1
1	1	>3min	1
2	1	>3min	1
2	1	=<3min	1
1	1	>3min	1
1	1	>3min	1
2	1	>3min	1
2	2	=<3min	1
1	1	>3min	1
1	1	>3min	0
1	1	>3min	1
2	1	>3min	1
1	1	>3min	1
1	1	>3min	1
2	1	>3min	1
2	1	>3min	1
2	1	>3min	1
1	1	>3min	1
2	1	>3min	1
1	1	>3min	1
1	1	>3min	1
1	1	>3min	1
2	1	>3min	1
2	1	>3min	1
2	1	>3min	1
2	1	>3min	1
2	1	>3min	1
1	1	>3min	1
1	1	>3min	1
1	1	>3min	1
2	1	>3min	1
1	1	>3min	1
2	1	>3min	1
1	1	>3min	1
2	1	>3min	1
1	1	>3min	1
2	1	>3min	1
1	1	>3min	0
1	1	>3min	1
1	1	=<3min	1
1	1	=<3min	1
1	1	>3min	1
2	1	=<3min	1
2	1	=<3min	1
1	1	>3min	1
1	1	>3min	1
2	2	=<3min	1
1	1	>3min	1
2	1	=<3min	1
1	1	>3min	1
1	1	>3min	1
1	1	>3min	1
1	1	>3min	0
1	1	>3min	1
2	2	>3min	1
1	1	>3min	1
1	1	>3min	1
1	1	=<3min	1
2	1	>3min	1
1	1	>3min	1
1	1	>3min	1
1	1	>3min	0
2	1	=<3min	1
1	1	>3min	1
1	1	>3min	1
1	1	=<3min	1
1	1	>3min	1
1	2	>3min	1
2	2	=<3min	1
1	1	>3min	1
1	1	>3min	1
2	1	>3min	1
1	1	>3min	1
1	1	=<3min	1
1	1	>3min	1
2	1	>3min	1
2	1	>3min	1
2	1	>3min	1
2	1	>3min	1
2	1	>3min	1
1	1	>3min	1
1	1	>3min	0
1	2	>3min	1
1	1	>3min	1
1	1	>3min	1
1	1	>3min	1
1	1	>3min	1
2	2	>3min	1
1	1	>3min	1
2	2	=<3min	1
1	1	>3min	1
2	1	>3min	1
1	1	>3min	1
1	1	>3min	1
1	1	>3min	1
1	1	>3min	1
2	2	>3min	1
1	1	>3min	0
1	1	>3min	1
2	1	>3min	1
2	1	>3min	1
2	1	=<3min	1
2	1	=<3min	1
1	1	>3min	1
2	2	>3min	1
1	1	>3min	1
1	1	>3min	1
1	1	>3min	1
1	1	>3min	1
2	1	=<3min	1
1	1	>3min	1
1	1	>3min	1
2	1	=<3min	1
2	1	>3min	1
2	1	>3min	1
1	1	>3min	1
1	1	>3min	1
1	1	>3min	0
2	1	>3min	1
2	1	>3min	1
2	2	>3min	1
1	1	>3min	1
2	1	>3min	1
1	1	>3min	0
2	1	>3min	1
1	1	>3min	1
1	1	>3min	1
1	1	>3min	1
1	1	>3min	0
1	2	>3min	1
1	1	>3min	1
2	1	>3min	1
1	1	>3min	1
1	1	>3min	1
1	1	>3min	1
1	1	>3min	1
1	1	>3min	1
1	1	>3min	1
1	1	>3min	1
2	1	>3min	1
1	1	>3min	0
1	1	>3min	1
1	1	>3min	1
2	1	>3min	1
1	1	>3min	1
1	1	>3min	1
2	2	=<3min	1
1	1	=<3min	1
1	1	>3min	1
1	1	>3min	1
1	1	>3min	1
2	1	>3min	1
1	1	>3min	1
2	1	>3min	1
2	1	>3min	1
1	1	>3min	1
1	1	=<3min	1
1	1	>3min	1
1	1	>3min	1
1	1	>3min	1
1	1	>3min	1
1	1	>3min	1
1	1	>3min	1
2	1	>3min	1
2	1	>3min	1
2	2	=<3min	1
1	1	>3min	1
1	1	>3min	1
1	1	>3min	1
1	1	>3min	1
1	1	=<3min	1
1	1	>3min	1
2	1	>3min	1
1	1	>3min	0
1	1	>3min	1
1	1	>3min	1
1	1	>3min	1
1	1	>3min	1
2	2	=<3min	1
1	1	>3min	1
2	1	>3min	1
2	1	>3min	1
1	1	>3min	1
1	1	>3min	1
1	1	>3min	1
2	2	>3min	1
1	1	=<3min	1
1	1	>3min	1
1	1	>3min	1
2	1	>3min	0
2	1	>3min	1
1	1	>3min	0
1	1	>3min	1
2	1	>3min	1
1	1	>3min	1
2	1	>3min	1
1	1	>3min	0
1	1	>3min	0
1	1	>3min	1
1	1	>3min	1
2	1	>3min	1
2	2	>3min	1
1	1	>3min	1
1	1	>3min	0
2	1	=<3min	1
2	1	=<3min	1
2	1	>3min	0
2	1	>3min	0
2	1	=<3min	1
1	1	=<3min	1
2	1	>3min	1
2	1	>3min	1
2	1	>3min	1
1	1	>3min	1
1	1	>3min	1
1	1	>3min	1
2	2	=<3min	1
2	1	>3min	1
1	1	=<3min	0
1	1	>3min	1
1	1	>3min	1
2	1	>3min	1
1	1	>3min	0
1	2	>3min	1
1	1	>3min	0
2	1	>3min	1
1	1	>3min	1
2	1	>3min	1
2	1	=<3min	1
2	1	>3min	1
1	1	>3min	1
1	1	>3min	1
1	1	>3min	1
2	1	=<3min	1
1	1	>3min	1
1	1	=<3min	1
2	2	=<3min	1
2	1	>3min	1
1	1	>3min	1
2	1	>3min	1
2	1	>3min	1
2	1	>3min	0
1	1	=<3min	1
1	1	>3min	0
1	1	>3min	1
1	1	>3min	1
2	1	=<3min	1
2	1	>3min	1
1	1	=<3min	1
1	1	>3min	1
2	1	>3min	1
1	1	=<3min	1
2	1	>3min	1
1	1	>3min	1
1	1	>3min	1
2	1	>3min	1
1	1	>3min	1
1	1	>3min	1
1	1	>3min	1
2	1	>3min	1
1	1	>3min	1
2	1	=<3min	1
1	1	>3min	1
1	1	=<3min	1
2	1	>3min	1
1	1	=<3min	1
1	1	>3min	1
1	1	=<3min	1
2	1	>3min	1
1	1	=<3min	1
2	1	=<3min	1
1	1	=<3min	1
2	1	>3min	1
1	1	>3min	1
1	1	>3min	0
1	1	>3min	1
2	2	>3min	1
1	1	=<3min	1
1	2	>3min	0
1	1	>3min	1
1	1	>3min	1
2	1	>3min	1
1	1	>3min	1
1	1	>3min	0
1	1	>3min	1
2	1	=<3min	1
2	1	>3min	1
1	1	>3min	1
1	1	>3min	1
1	1	>3min	1
2	1	>3min	1
1	1	=<3min	1
1	1	>3min	1
1	1	>3min	1
1	1	>3min	1
2	1	=<3min	1
2	1	=<3min	1
1	2	>3min	1
1	1	>3min	0
1	1	>3min	1
1	1	>3min	1
1	1	=<3min	1
2	1	>3min	1
1	1	>3min	1
2	1	>3min	1
1	1	>3min	1
1	1	>3min	1
1	1	>3min	1
1	1	>3min	1
2	1	>3min	1
1	1	>3min	1
1	1	>3min	1
2	1	>3min	1
2	1	>3min	1
2	2	>3min	1
1	1	>3min	1
1	1	>3min	1
1	1	>3min	1
1	1	>3min	1
1	1	>3min	1
1	1	>3min	1
1	2	>3min	1
2	1	>3min	1
2	1	>3min	1
2	1	>3min	1
1	1	>3min	1
1	1	>3min	1
1	1	=<3min	1
1	1	>3min	1
1	2	=<3min	1
1	1	>3min	1
1	1	>3min	1
1	1	>3min	1
1	1	>3min	1
1	1	>3min	1
2	1	>3min	1
1	1	>3min	1
1	1	>3min	1
1	2	=<3min	1
2	1	>3min	1
1	1	>3min	1
1	1	>3min	1
2	1	>3min	1
1	1	=<3min	1
1	1	>3min	1
2	2	>3min	1
1	1	=<3min	1
1	1	>3min	1
1	1	>3min	1
1	1	>3min	1
1	1	=<3min	1
1	1	>3min	1
2	1	>3min	1
2	1	>3min	1
1	1	>3min	1
2	2	=<3min	1
2	1	>3min	1
2	1	>3min	1
2	1	>3min	1
1	1	>3min	1
1	1	>3min	0
1	1	>3min	1
1	1	>3min	1
1	1	=<3min	1
2	1	>3min	1
2	1	>3min	1
1	1	>3min	0
1	1	>3min	1
1	1	>3min	1
2	1	>3min	1
1	1	>3min	1
1	1	>3min	1
1	1	>3min	1
2	1	>3min	1
2	1	=<3min	1
2	1	>3min	1
1	1	>3min	1
2	1	>3min	1
2	1	>3min	1
1	1	=<3min	1
1	1	>3min	1
2	1	>3min	1
1	1	>3min	1
1	1	>3min	1
1	1	>3min	1
1	1	>3min	1
1	1	>3min	0
1	1	>3min	1
1	1	>3min	1
1	1	>3min	1
1	1	>3min	1
1	1	>3min	1
1	1	>3min	1
1	1	>3min	1
2	1	>3min	1
1	1	=<3min	1
1	1	>3min	1
1	1	=<3min	1
2	1	>3min	1
1	2	>3min	1
1	1	>3min	1
2	1	=<3min	1
1	1	>3min	1
1	1	>3min	1
1	1	>3min	0
2	1	>3min	1
2	1	>3min	1
1	1	>3min	1
2	1	>3min	1
1	1	=<3min	1
1	1	>3min	1
2	1	>3min	1
1	1	>3min	1
1	1	=<3min	1
1	1	>3min	1
1	1	>3min	1
1	1	>3min	1
2	1	=<3min	1
1	1	>3min	0
1	1	>3min	1
2	1	>3min	1
1	1	>3min	0
2	1	=<3min	1
1	1	>3min	0
1	1	>3min	0
1	1	>3min	1
1	1	>3min	1
2	1	>3min	1
2	1	>3min	1
1	1	>3min	1
1	1	>3min	1
1	1	=<3min	1
2	1	>3min	1
1	1	>3min	0
2	1	>3min	1
2	1	>3min	1
2	1	>3min	1
1	1	>3min	1
1	1	>3min	1
2	2	>3min	1
1	1	>3min	1
2	1	>3min	1
2	1	=<3min	1
2	1	>3min	1
1	1	>3min	0
1	1	=<3min	1
2	1	>3min	1
1	1	>3min	1
1	1	>3min	1
1	1	>3min	1
1	1	>3min	1
1	1	>3min	0
1	1	>3min	0
1	1	>3min	0
1	1	>3min	1
1	1	>3min	1
1	2	>3min	1
1	1	>3min	1
1	1	>3min	1
1	1	>3min	1
1	1	>3min	1
2	1	>3min	1
2	1	>3min	1
1	1	>3min	1
1	1	>3min	1
1	1	>3min	1
2	1	>3min	1
1	1	>3min	1
2	1	>3min	1
2	1	>3min	1
1	1	=<3min	1
2	1	>3min	0
2	1	>3min	1
1	1	>3min	0
2	1	>3min	1
1	1	>3min	1
1	1	>3min	1
1	1	>3min	1
1	1	>3min	0
1	1	>3min	1
2	1	>3min	1
2	2	>3min	1
1	1	>3min	1
1	1	>3min	1
1	1	>3min	1
1	1	>3min	1
1	1	>3min	1
2	1	>3min	1
2	1	>3min	1
2	2	=<3min	1
1	1	>3min	0
1	1	>3min	0
1	1	>3min	0
2	1	>3min	1
2	1	=<3min	1
2	1	>3min	1
2	1	>3min	0
2	1	>3min	1
1	1	>3min	0
1	2	>3min	0
1	1	>3min	0
1	1	>3min	1
1	1	>3min	1
1	1	>3min	1
2	1	>3min	1
1	1	>3min	0
1	1	>3min	0
2	1	=<3min	1
1	1	>3min	0
1	1	>3min	0
1	1	>3min	1
2	1	>3min	1
1	1	=<3min	1
1	1	>3min	1
2	1	>3min	1
1	1	>3min	0
2	1	>3min	1
1	1	>3min	1
1	1	>3min	1
1	1	>3min	0
2	1	>3min	1
1	1	=<3min	1
2	1	>3min	1
1	1	>3min	0
1	1	>3min	1
1	1	>3min	0
2	1	>3min	1
2	1	=<3min	1
2	1	>3min	1
1	1	>3min	1
1	1	>3min	1
1	1	>3min	1
1	1	>3min	1
2	1	>3min	0
2	2	>3min	1
1	1	>3min	1
1	1	=<3min	1
2	1	>3min	1
1	1	>3min	1
2	1	>3min	1
1	1	>3min	1
1	1	>3min	1
1	1	>3min	1
1	1	>3min	1
2	1	>3min	1
1	1	>3min	1
1	2	=<3min	1
1	1	>3min	1
1	1	>3min	0
1	1	>3min	0
2	1	>3min	1
1	1	>3min	1
2	1	>3min	1
1	1	>3min	1
1	1	>3min	1
